# Supplementary material for: Role of metal and anions in organo-metal halide perovskites CH3NH3MX3 (M: Cu, Zn, Ga, Ge, Sn, Pb; X: Cl, Br, I) on structural and optoelectronic properties for photovoltaic applications
Source: Royal Society of Chemistry journal article supplement (doi:10.1039/d1ra08561a), 2022-01-01
Supplement: d1ra08561a1.pdf [file d1ra08561a1.pdf]

## Supplementary File

### **Role of Metal and Anions in Organo-Metal Halide Perovskites CH<sub>3</sub>NH<sub>3</sub>MX<sub>3</sub> (M: Cu, Zn, Ga, Ge, Sn, Pb; X: Cl, Br, I) on Structural and Optoelectronic Properties for Photovoltaic Applications**

**Maliha Nishat<sup>a\*</sup>, Md. Kamal Hossain<sup>b</sup>, Md. Rakib Hossain<sup>c</sup>, Shamima Khanom<sup>b</sup>, Farid Ahmed<sup>b</sup>, Md. Abul Hossain<sup>b</sup>**

<sup>a</sup> Department of Physics, Pabna University of Science and Technology, Pabna-6600, Bangladesh

<sup>b</sup> Department of Physics, Jahangirnagar University, Dhaka-1342, Bangladesh

<sup>c</sup> Department of Physics, Bangabandhu Sheikh Mujibur Rahman Science and Technology University, Gopalganj-8100, Bangladesh

Corresponding author: Maliha Nishat ([malihanishat@pust.ac.bd](mailto:malihanishat@pust.ac.bd))

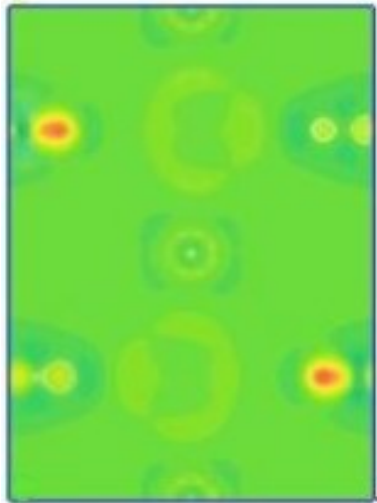

(a)  $\text{CH}_3\text{NH}_3\text{PbI}_3$

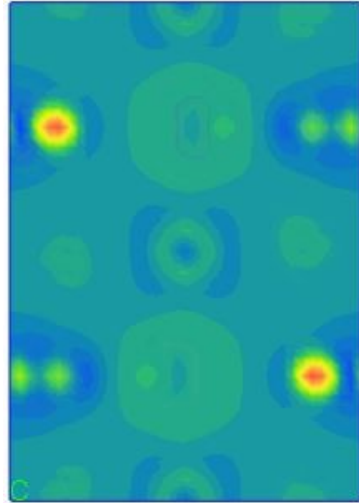

(b)  $\text{CH}_3\text{NH}_3\text{Br}_3$

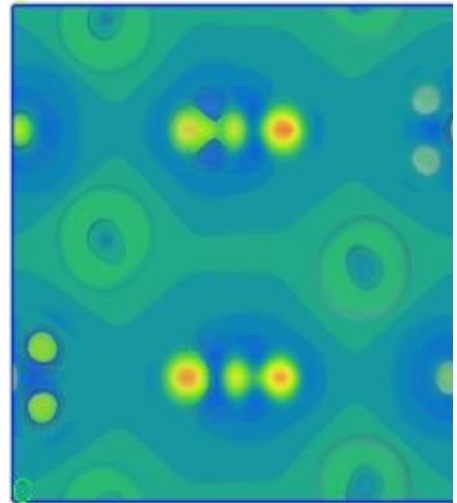

(c)  $\text{CH}_3\text{NH}_3\text{PbCl}_3$

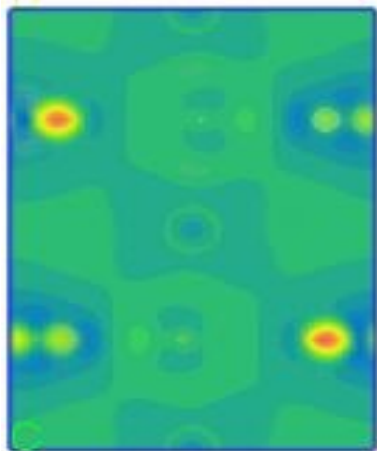

(d)  $\text{CH}_3\text{NH}_3\text{SnI}_3$

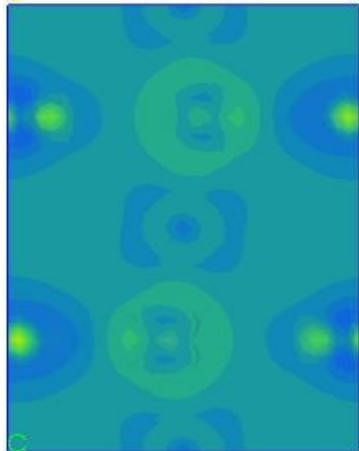

(e)  $\text{CH}_3\text{NH}_3\text{SnBr}_3$

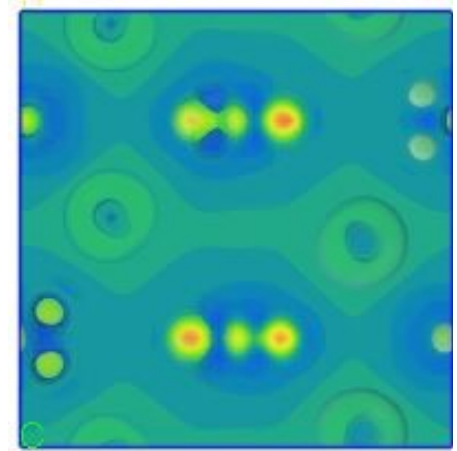

(f)  $\text{CH}_3\text{NH}_3\text{SnCl}_3$

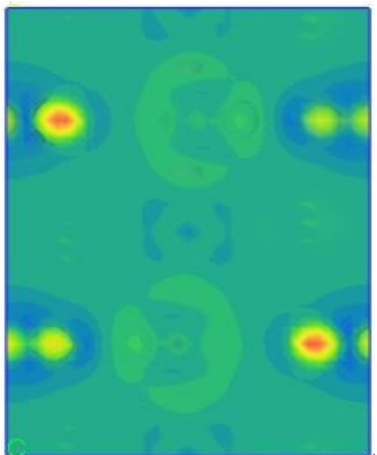

(g)  $\text{CH}_3\text{NH}_3\text{GeI}_3$

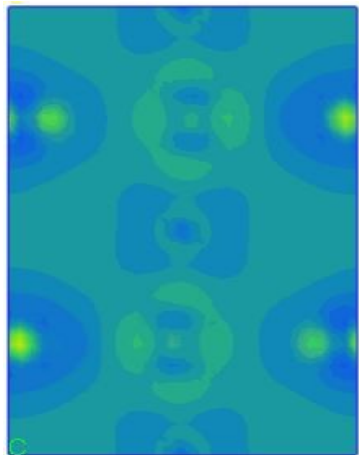

(h)  $\text{CH}_3\text{NH}_3\text{GeBr}_3$

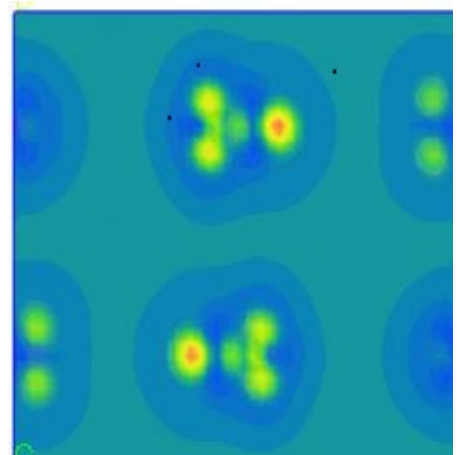

(i)  $\text{CH}_3\text{NH}_3\text{GeCl}_3$

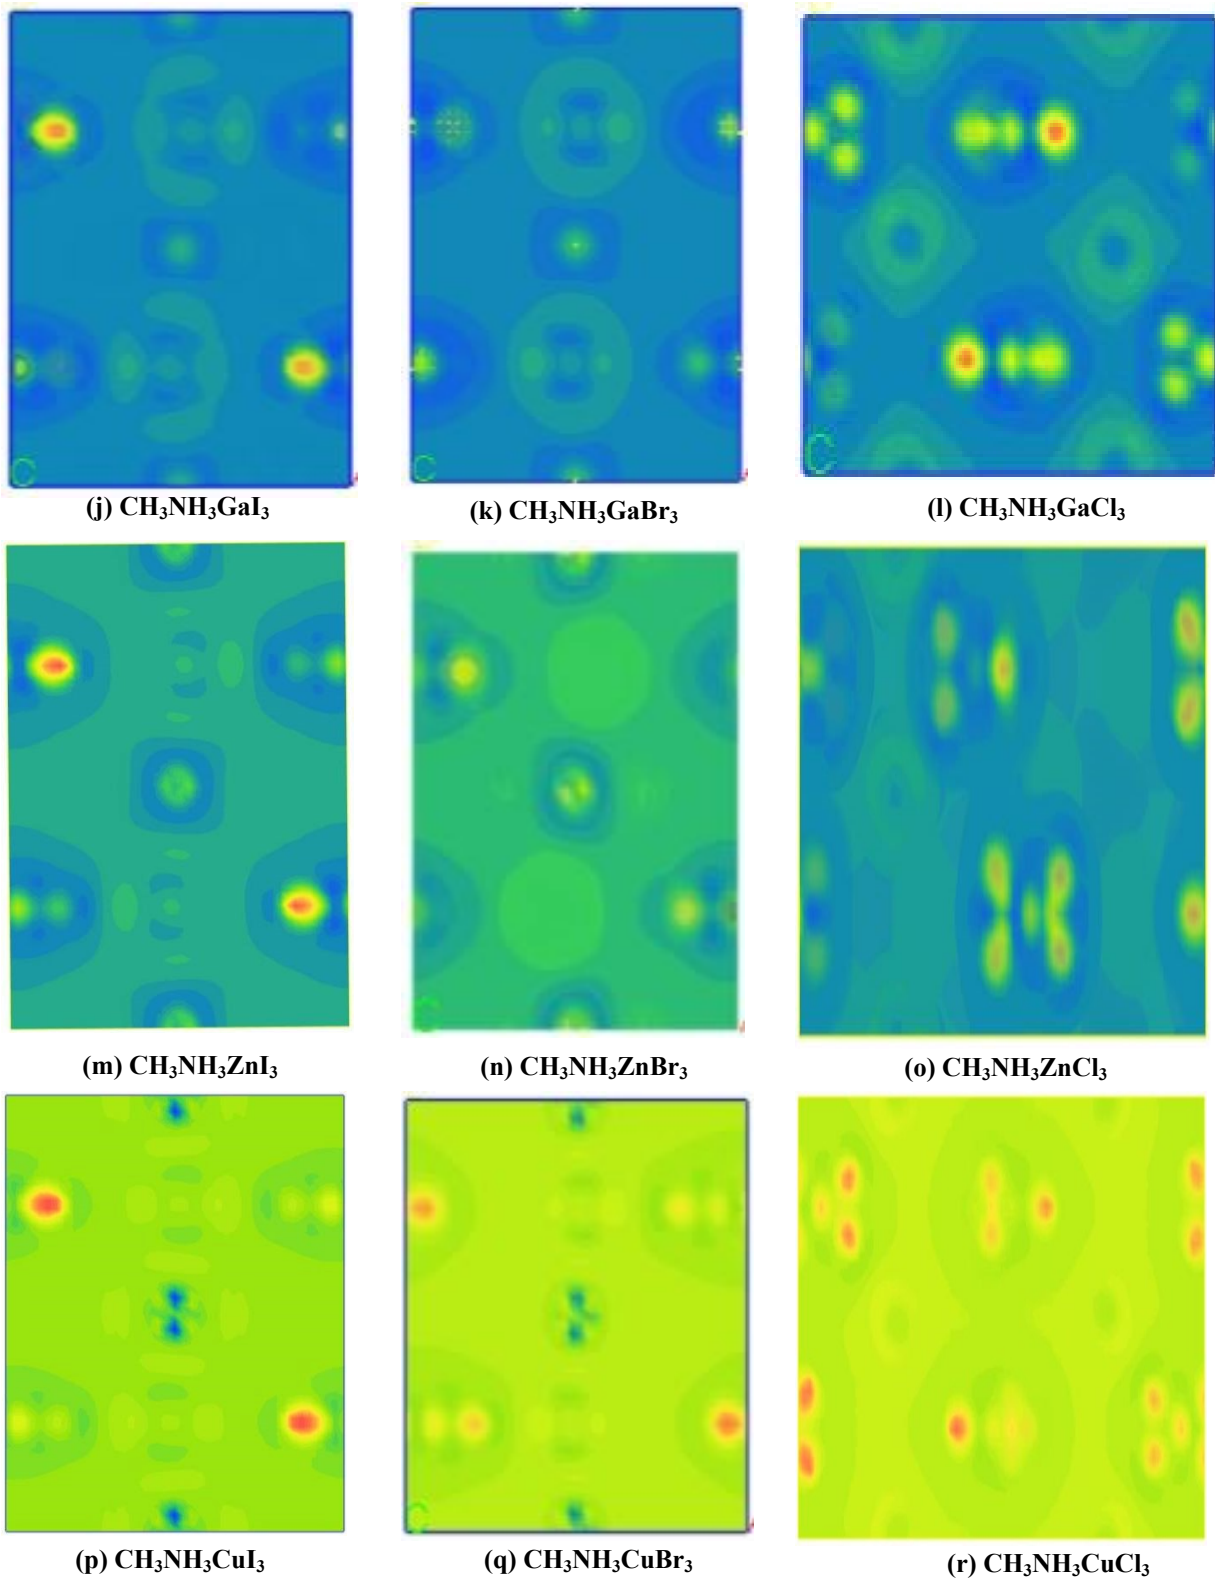

**Fig. S1.** Total electronic charge density for methylammonium metal halide; a field representation. The units are electrons  $\text{\AA}^{-3}$ . In field representation, from blue to orange color symbolize the change of electron density from low to high.



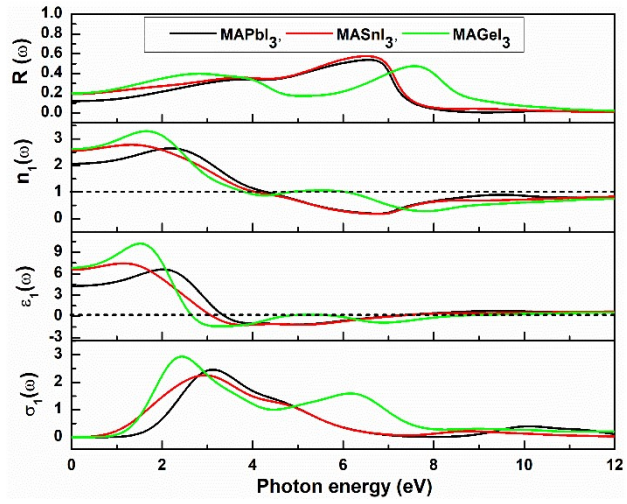

(a)

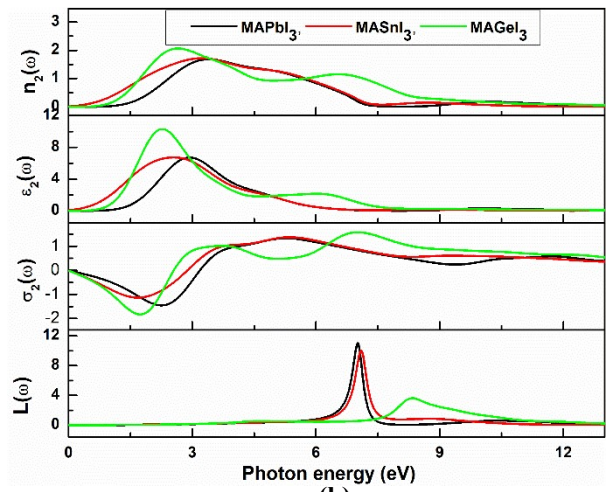

(b)

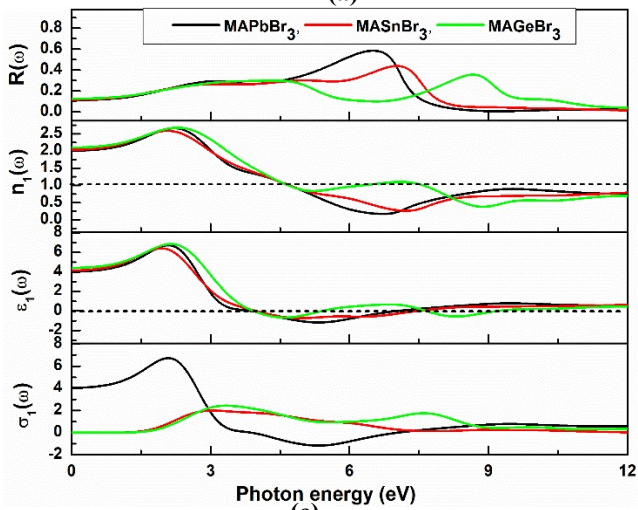

(c)

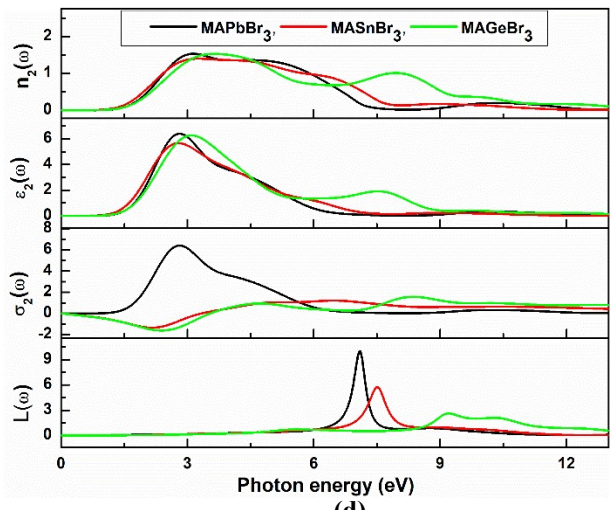

(d)

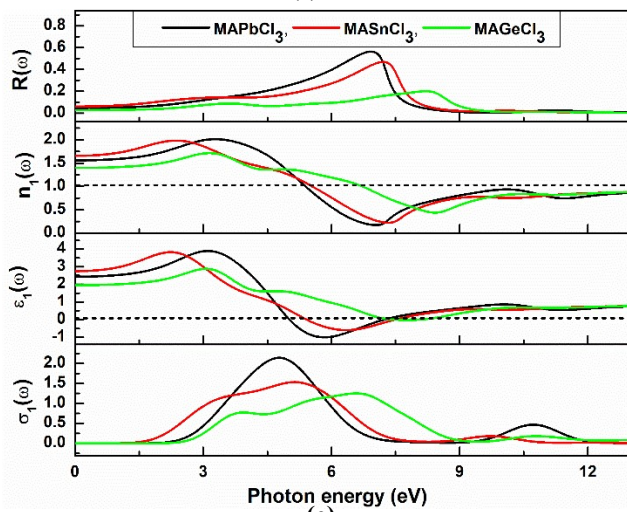

(e)

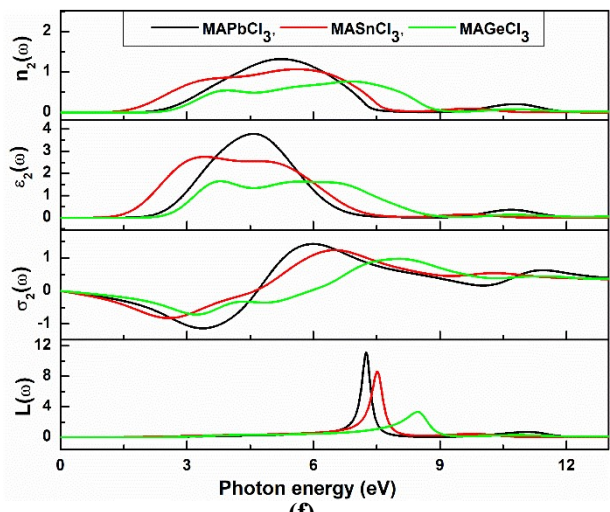

(f)

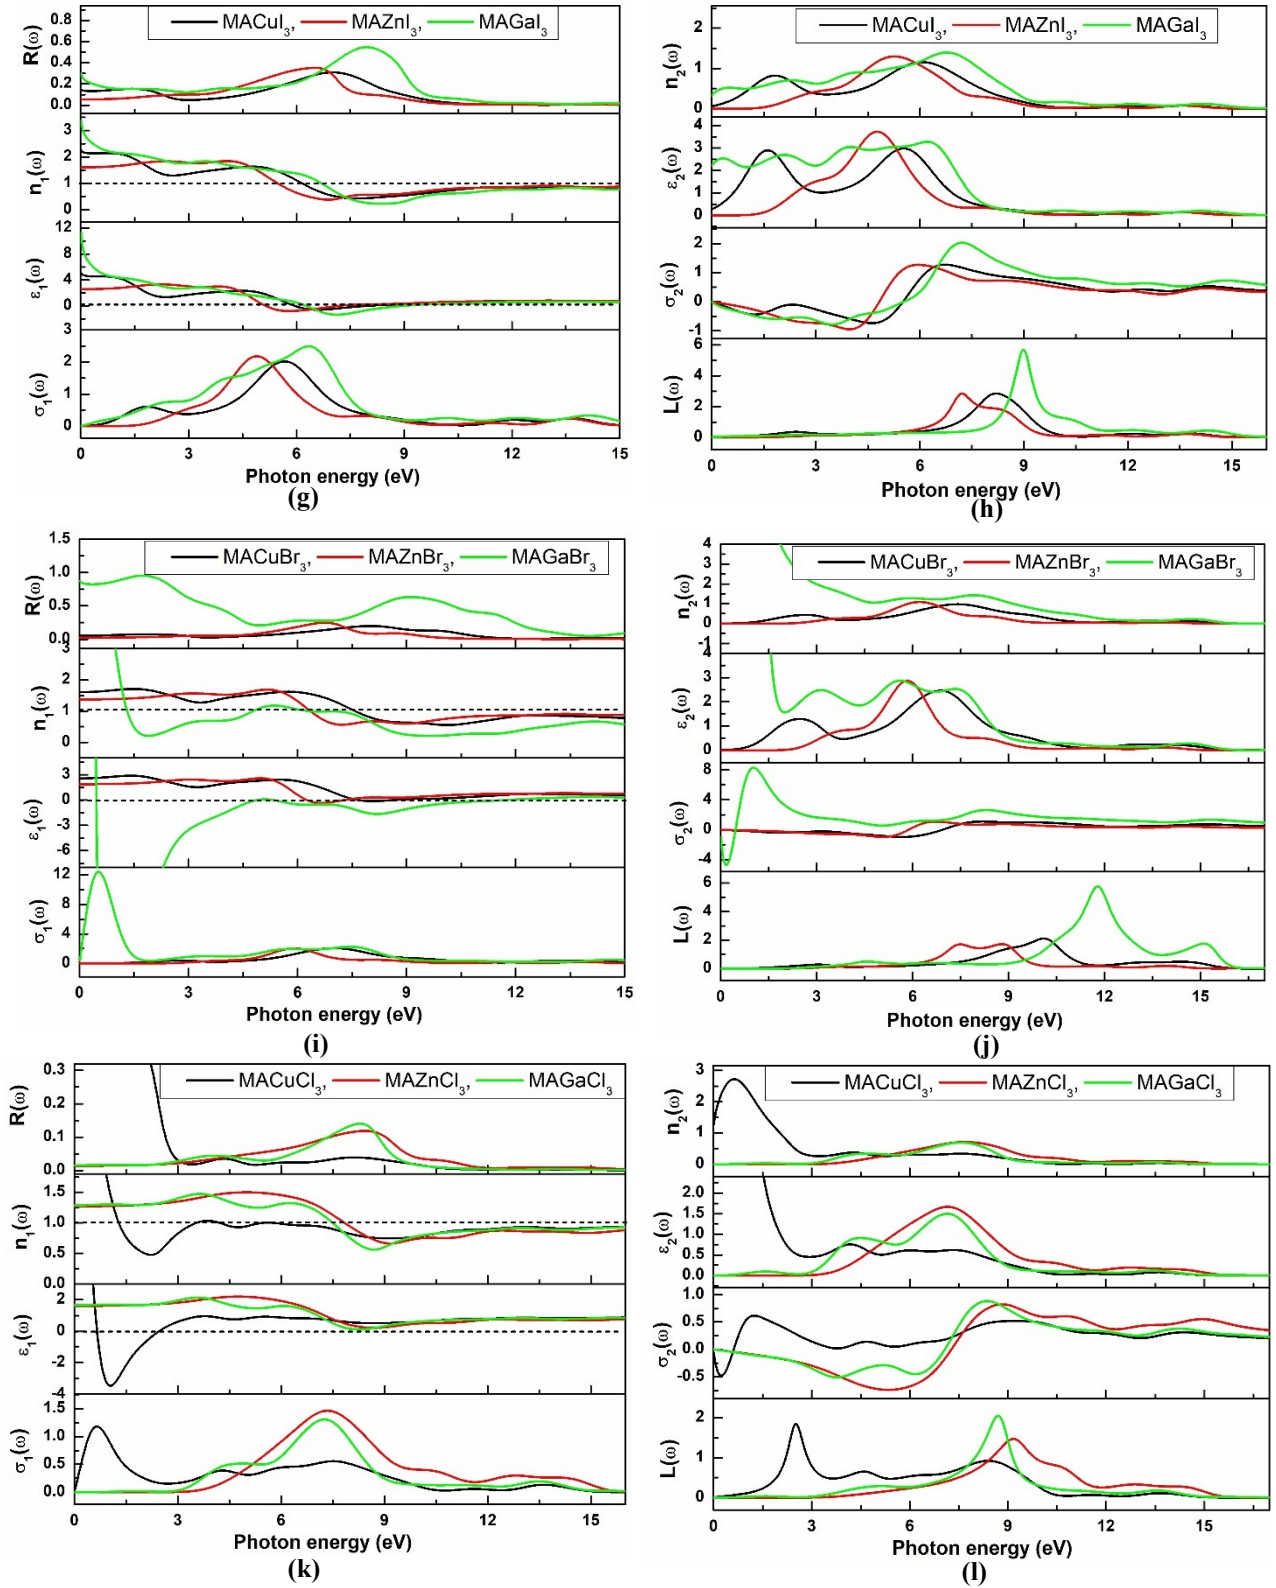

**Fig. S2.** Representation of different optical properties of orthorhombic  $\text{CH}_3\text{NH}_3\text{MX}_3$  (where  $\text{CH}_3\text{NH}_3 = \text{MA}$ ,  $\text{M} = \text{Cu, Zn, Ga, Ge, Sn, Pb}$ ;  $\text{X} = \text{Cl, Br, I}$ ). Reflectivity  $R(\omega)$ , Real part of the refractive index  $n_1(\omega)$ , dielectric constant  $\epsilon_1(\omega)$ , and optical conductivity  $\sigma_1(\omega)$  as a function of energy in eV are illustrated in (a), (c), (e), (g), (i) and (K); Imaginary

part of the refractive index  $n_2(\omega)$ , dielectric constant  $\epsilon_2(\omega)$ , and optical conductivity  $\sigma_2(\omega)$  and energy loss function  $L(\omega)$  are shown in (b), (d), (f), (h), (j) and (l).
